# Supplementary material for: Spatial readout of visual looming in the central brain of Drosophila
Source: eLife journal article supplement (doi:10.7554/elife.57685), 2020-11-18
Supplement: supp3 [file elife-57685-supp3-v2.pdf]

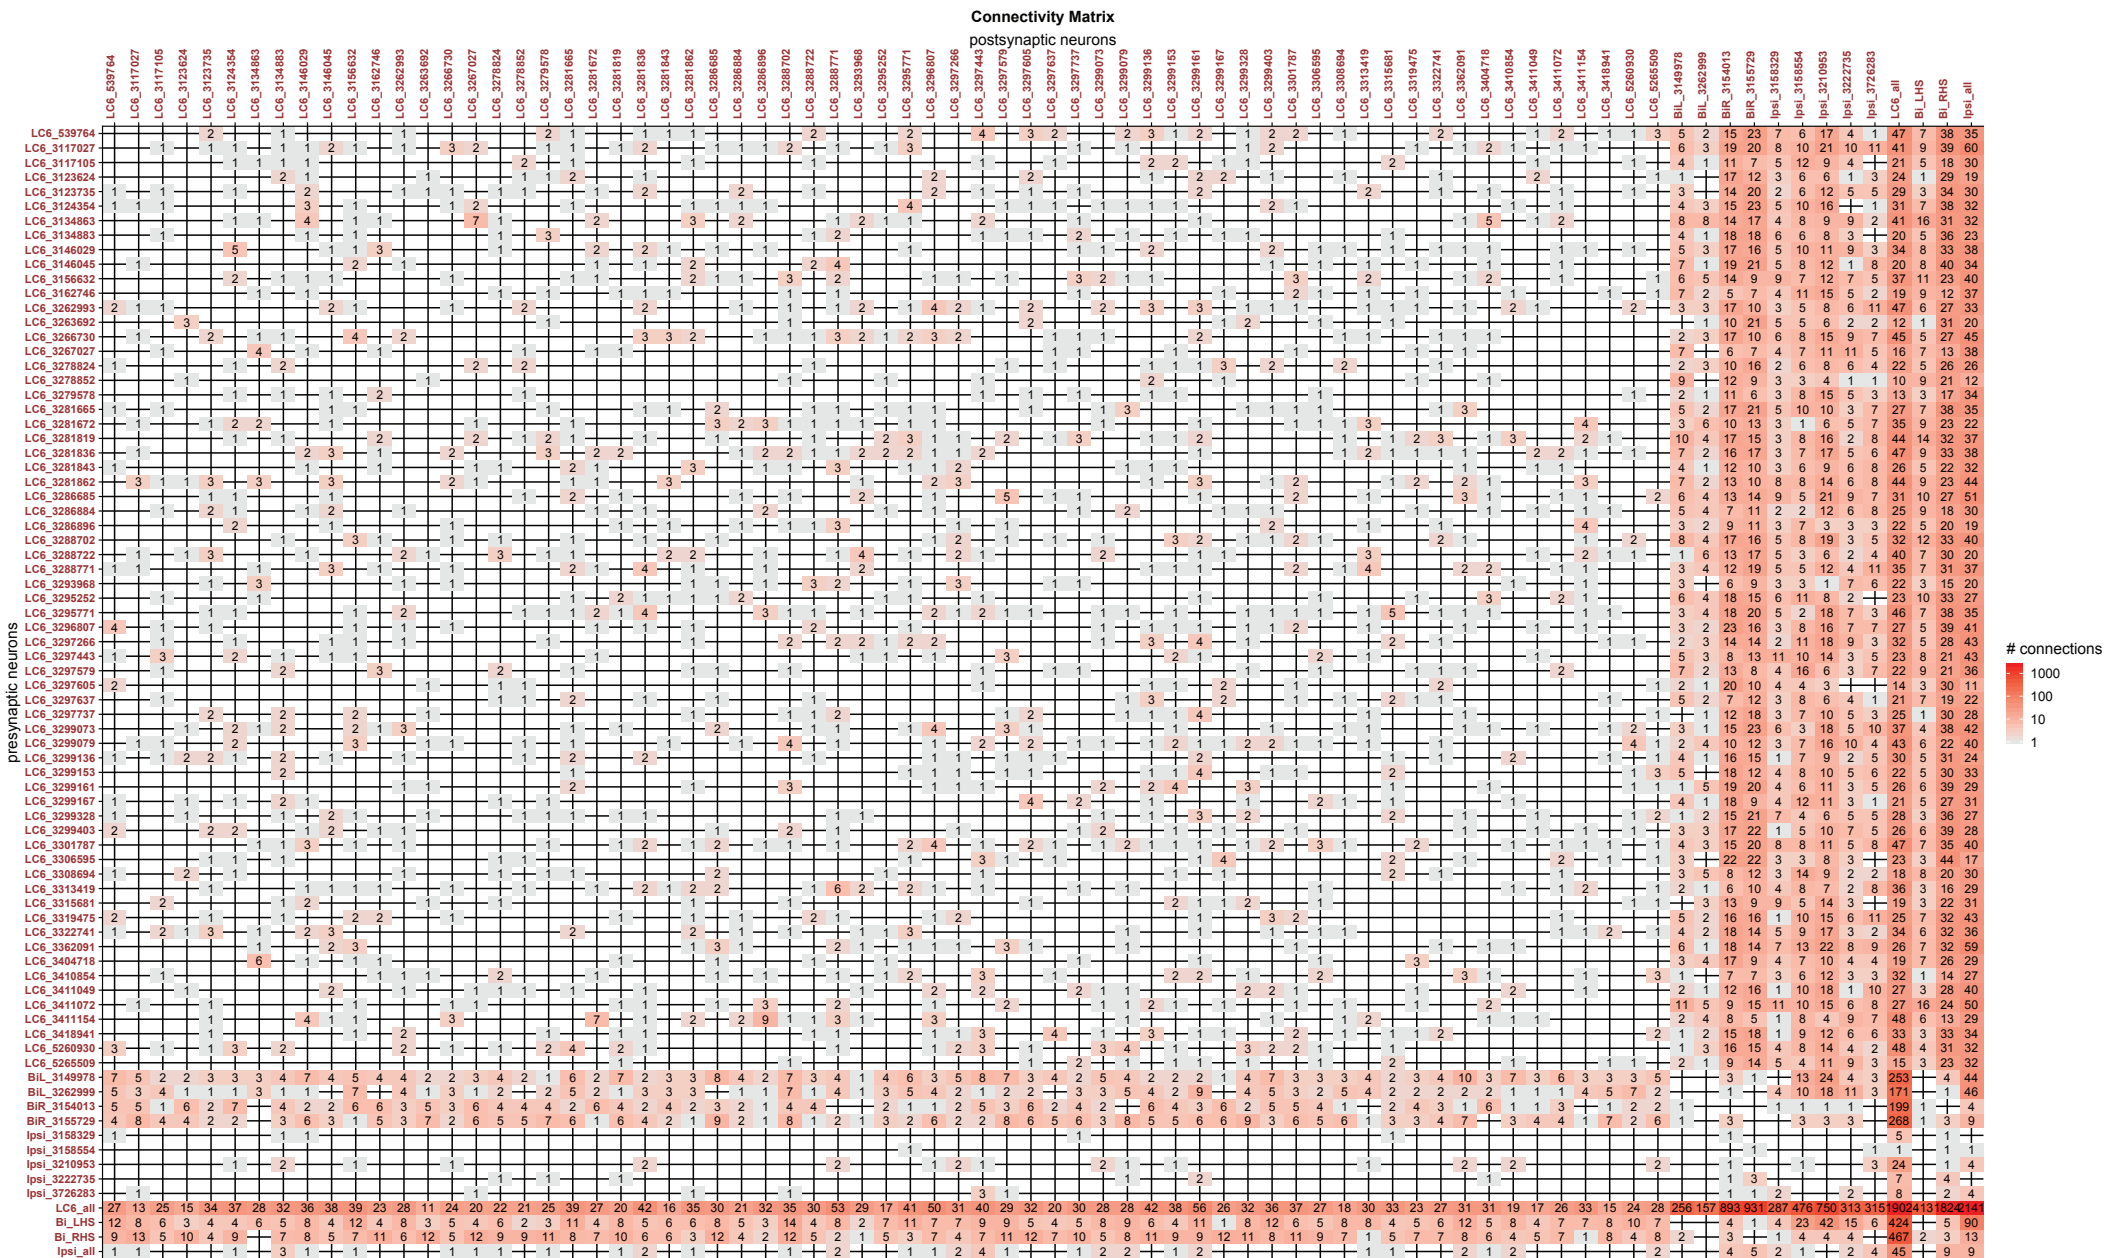

Connectivity matrix of LC6 and target neurons from EM data, related to Figure 6
