# Supplementary material for: Spatial readout of visual looming in the central brain of Drosophila
Source: eLife. 2020 Nov 18;9:e57685. doi: 10.7554/eLife.57685 (PMC7744102; doi:10.7554/eLife.57685)
Supplement: Supplementary file 4. — Table 1. provides details of cells identified as likely matches of LC6G cell types in the hemibrain dataset as well as some related cells considered in the annotation process. The table includes the hemibrain identifiers (‘hemibrain_bodyId’), hemibrain cell type names (‘hemibrain_type’), LC6G annotations (‘new_type’), synaptic connections with LC6, LC16 and LC26 in the central brain and some notes related to the LC6G annotations. Table 2. lists all LC6 targets in the hemibrain (excluding other LC6 cells) that receive more than 100 combined central brain synapses from all LC6 neurons. Table 3. lists LC6 inputs in the hemibrain (excluding other LC6 cells) that provide more than 30 combined central brain synapses to all LC6 neurons. [file elife-57685-supp4.xlsx]

## Sheet: Table1-LC6G_cells_hemibrain
hemibrain_bodyId	hemibrain_type	new_type	synapses_from_LC6	synapses_to_LC6	synapses_from_LC16	synapses_to_LC16	synapses_from_LC26	synapses_to_LC26	Notes
5813026724	PVLP008_a	LC6G1	413	281	13	0	0	0
519909788	PVLP008_a	LC6G1	278	290	59	0	1	0
828826327	PVLP008_a	LC6G1	125	187	157	4	2	0	more LC16 than LC6 input; perhaps a different type
674687388	PVLP008_a	LC6G1	977	299	2	3	0	0
889535602	PVLP008_a	LC6G1	711	356	3	0	0	0
858838262	PVLP008_a	LC6G1_uni	803	279	7	6	1	0	either an incompletely reconstructed LC6G1 cell or an ipsilateral cell type similar to LC6G1
1289924339	None	LC6G1L	38	60	0	2	0	0	low synapse numbers compared to other apparent LC6G1L cells; perhaps a different type
858842517	None	LC6G1L	132	250	23	0	0	0
426489829	None	LC6G1L	34	58	94	13	4	0	more LC16 than LC6 input; perhaps a different type
5812981085	None	LC6G1L	152	146	0	0	1	0
550927367	None	LC6G1L	253	270	0	0	0	0
426489841	None	LC6G1L	127	216	2	0	0	0
705722736	None	LC6G1L	122	215	0	0	1	0
581603800	PVLP008_b	PVLP008_b	17	11	375	2	0	0
612634432	PVLP008_b	PVLP008_b	22	8	427	1	8	4
581599704	PVLP008_c	PVLP008_c	22	4	133	1	24	2
5813070572	PVLP008_c	PVLP008_c	79	22	148	10	79	6
581599674	PVLP008_c	PVLP008_c	36	5	76	5	123	5
5813075410	PVLP008_c	PVLP008_c_uni	15	9	239	6	3	1	similar to other PVLP008_c but no contralateral projection (or possibly incomplete reconstruction)
768806088	PVLP008_c	PVLP008_c_uni	22	6	169	1	12	8	similar to other PVLP008_c but no contralateral projection (or possibly incomplete reconstruction)
736748242	PVLP007	LC16G1	2	2	577	28	3	4	similar to LC6G1 but with connections in the LC16 glomerulus
581262846	PVLP007	LC16G1	19	4	1262	15	0	0
5813057854	PVLP007	LC16G1	26	0	1630	416	1	0
798132291	PVLP007	LC16G1	2	0	1811	162	1	0
644001906	PVLP007	LC16G1_uni	42	4	1145	272	2	1	similar to other LC16G1/PVLP007 but no contralateral projection (or possibly incomplete reconstruction)
737093754	PVLP007	LC16G1_uni	3	1	2041	527	2	0	similar to other LC16G1/PVLP007 but no contralateral projection (or possibly incomplete reconstruction)
737093692	PVLP007	LC16G1_uni	5	0	1161	8	0	0	similar to other LC16G1/PVLP007 but no contralateral projection (or possibly incomplete reconstruction)
767787456	None	LC16G1L	0	0	177	370	0	0
426148655	None	LC16G1L	0	0	543	677	1	0
550573520	None	LC16G1L	1	0	155	255	0	0
550577624	None	LC16G1L	0	0	130	187	1	1
581599794	None	LC16G1L	0	0	177	268	0	0
1289574568	PVLP133_a	LC6G2	34	2	208	2	10	0
1351667174	PVLP133_b	LC6G2	178	2	37	0	1	0
1319583458	PVLP133_b	LC6G2	161	11	149	5	27	0
1381656679	PVLP133_a	LC6G2	11	0	53	0	0	0
1352335943	PVLP133_b	LC6G2	88	3	11	0	2	0
912290165	PVLP133_a	LC6G2	65	3	177	3	3	1
974027716	PVLP133_a	LC6G2	161	4	180	1	12	1
1414405144	PVLP133_c	PVLP133_c	1	1	8	0	5	0	PVLP133_c cells have a general shape similar to LC6G2 but almost no overlap with the LC6 and LC16 glomeruli
1411327661	PVLP133_c	PVLP133_c	1	0	1	0	0	0
1472675999	PVLP133_c	PVLP133_c	1	0	0	0	19	1
1473379778	PVLP133_c	PVLP133_c	0	0	0	0	0	0
1442708190	PVLP133_c	PVLP133_c	4	0	6	0	2	0
5813048443	PVLP006	LC6G3	353	234	7	9	0	0	synapses mostly with LC6, not LC16
1073691439	PVLP006	LC6G3	178	176	163	1	0	0	similar input from LC6 and LC16
1289242975	AVLP468	LC6G4	59	0	2	0	26	1
5813038177	AVLP468	LC6G4	233	0	2	2	2	0
1226831477	AVLP468	LC6G4	148	2	4	2	13	1
1289920105	AVLP468	LC6G4	164	2	4	0	3	0
1351312482	PVLP059	LC6G5	60	2	2	0	1	0	further analyses will be reuqired to determine which subset of PVLP058/59 cells is labeled by the LC6G5 driver lines
1412700292	PVLP059	LC6G5	18	3	0	0	2	0
1446066048	PVLP059	LC6G5	3	0	1	0	0	0	only very few connections to either LC6 or LC16
1353708479	PVLP059	LC6G5	32	1	5	0	0	0
1444046333	PVLP059	LC6G5	54	2	4	0	0	0
1323015482	PVLP058	LC6G5	5	0	48	4	0	0	this and some other (but not all) PVLP058 cells appear to stronger LC16 than LC6 targets
1351999057	PVLP058	LC6G5	28	0	7	0	2	1
1350612846	PVLP058	LC6G5	3	0	121	6	0	0	this and some other (but not all) PVLP058 cells appear to stronger LC16 than LC6 targets
1381306709	PVLP058	LC6G5	10	0	113	7	0	0	this and some other (but not all) PVLP058 cells appear to stronger LC16 than LC6 targets
760306167	PVLP003	LC26G1	2	2	22	33	832	684	control cell type used in functional connectivity experiments, strong LC26 input consistent with LM data
643660756	None	LCG_bil_L_unclear	0	0	23	7	1	0	shape similar to LC6G1L and L16G1L but only no or weak connections to these LC types
1166458109	None	LCG_bil_L_unclear	0	0	67	37	3	1
736757369	None	LCG_bil_L_unclear	0	1	22	0	14	3
426494132	None	LCG_bil_L_unclear	7	3	29	1	20	1
767787451	None	LCG_bil_L_unclear	0	0	16	0	0	0	could be part of an bilateral cell type or similar ipsilateral cell
"hemibrain_type" is the hemibrain 1.1 type ("None" indicates cells without a type name in hemibrain 1.1)
"new_type" lists the LC6G name if applicable (or another new identifier), otherwise the hemibrain 1.1 type

## Sheet: Table2-top LC6 targets by cell
hemibrain_bodyId	new_type	LC11	LC12	LC15	LC16	LC17	LC18	LC21	LC26	LC4	LC6	LC9	LPLC1	LPLC2	total	%LC6
674687388	LC6G1	0	0	0	2	0	0	0	0	0	977	0	0	0	1194	81.8258
858838262	LC6G1_uni	0	0	3	7	0	0	1	1	0	803	1	0	0	1022	78.5714
889535602	LC6G1	0	0	0	3	0	0	0	0	0	711	16	0	0	989	71.8908
1632016438	AVLP498	0	0	0	2	0	0	0	4	0	427	2	0	0	4900	8.71429
5813026724	LC6G1	0	0	13	13	0	0	0	0	0	413	4	0	0	673	61.367
5813048443	LC6G3	15	0	7	7	0	0	4	0	0	353	0	0	0	634	55.6782
519909788	LC6G1	0	0	0	59	0	0	0	1	0	278	0	0	0	584	47.6027
5813023322	DNp06	0	0	1	0	0	1	0	0	232	260	0	714	765	11532	2.2546
550927367	LC6G1L	0	0	0	0	0	0	3	0	0	253	0	0	0	281	90.0356
5813038177	LC6G4	0	0	11	2	0	0	14	2	0	233	0	0	0	581	40.1033
5813068559	AVLP396	0	0	0	6	62	0	0	0	0	207	2	0	116	4191	4.93916
1290270553	AVLP158	0	0	0	2	0	0	0	0	0	183	2	0	0	1192	15.3523
1351667174	LC6G2	0	0	3	37	0	1	0	1	0	178	0	0	0	575	30.9565
1073691439	LC6G3	19	0	0	163	0	0	1	0	0	178	9	0	0	741	24.0216
796733478	CL263	0	0	0	4	0	0	0	0	0	178	0	0	0	2958	6.01758
1312061760	AVLP572	0	0	41	0	96	0	0	1	14	172	0	3	5	3002	5.72951
1102407288	AVLP197	1	0	1	2	0	0	0	1	0	171	0	0	0	1600	10.6875
1135112830	AVLP174	0	0	0	0	0	0	0	0	0	169	0	0	1	1487	11.3652
1289920105	LC6G4	0	0	3	4	0	0	98	3	0	164	0	0	0	729	22.4966
974027716	LC6G2	0	0	0	180	0	1	0	12	0	161	0	0	0	610	26.3934
1319583458	LC6G2	0	0	3	149	0	0	1	27	0	161	0	0	0	637	25.2747
1009980185	AVLP197	0	0	5	1	0	0	0	0	0	156	0	0	0	1382	11.288
1068885266	PVLP151	2	0	218	3	1094	4	8	0	369	154	239	12	754	4969	3.09922
5812981085	LC6G1L	0	0	0	0	0	0	0	1	0	152	0	0	0	175	86.8571
1226831477	LC6G4	0	0	6	4	0	0	0	13	0	148	0	0	0	366	40.4372
858842517	LC6G1L	0	0	0	23	0	0	0	0	0	132	0	0	0	172	76.7442
1070950293	PVLP151	2	0	156	0	282	4	20	0	229	128	149	6	627	3469	3.68982
426489841	LC6G1L	0	0	0	2	0	0	0	0	0	127	0	0	0	146	86.9863
828826327	LC6G1	0	0	0	157	0	0	0	2	0	125	0	0	0	523	23.9006
5813041323	AVLP279	0	0	0	1	0	0	0	0	0	123	0	0	0	569	21.6169
705722736	LC6G1L	0	0	0	0	0	0	0	1	0	122	0	0	0	138	88.4058
769263962	AVLP477	0	0	0	121	0	0	0	2	0	122	3	0	0	3518	3.46788
1100357249	CL067	0	0	0	0	0	0	0	0	0	114	277	0	2	1418	8.03949
1383703581	AVLP505	0	0	0	2	0	0	0	1	0	114	0	0	0	1821	6.2603
1162081064	AVLP197	0	0	0	1	0	0	0	0	0	113	1	0	0	974	11.6016
Cells with a total of at least 100 synaptic connections from the 61 annotated LC6 cells in the hemibrain (release 1.1)
"new_type" lists the LC6G name if applicable, otherwise the hemibrain 1.1 type

## Sheet: Table3-top LC6 inputs by cell
hemibrain_bodyId	new_type	LC11	LC12	LC15	LC16	LC17	LC18	LC21	LC26	LC4	LC6	LC9	LPLC1	LPLC2	total	%LC6
822708945	mALD3	0	0	0	1	0	0	0	0	0	402	16	0	0	3887	10.3422
889535602	LC6G1	0	0	0	0	0	0	0	0	0	356	0	0	0	536	66.4179
674687388	LC6G1	0	0	0	3	0	0	0	0	0	299	0	0	0	532	56.203
519909788	LC6G1	0	0	0	0	0	0	0	0	0	290	0	0	0	377	76.9231
5813026724	LC6G1	0	0	0	0	0	0	0	0	0	281	0	0	0	398	70.603
858838262	LC6G1_uni	0	0	0	6	0	0	0	0	0	279	0	0	0	583	47.8559
550927367	LC6G1L	0	0	0	0	0	0	1	0	0	270	0	0	0	373	72.3861
858842517	LC6G1L	0	0	0	0	0	0	0	0	0	250	0	0	0	363	68.8705
5813048443	LC6G3	0	0	0	9	0	0	0	0	0	234	0	0	0	585	40
426489841	LC6G1L	0	0	0	0	0	0	0	0	0	216	0	0	0	292	73.9726
705722736	LC6G1L	0	0	0	0	0	0	0	0	0	215	0	0	0	280	76.7857
828826327	LC6G1	0	0	0	4	0	0	0	0	0	187	0	0	0	299	62.5418
1073691439	LC6G3	2	0	0	1	0	0	1	0	0	176	112	1	0	632	27.8481
5812981085	LC6G1L	0	0	0	0	0	0	0	0	0	146	0	0	0	236	61.8644
5813080753	None	0	0	0	2	0	0	0	0	0	77	0	0	0	891	8.64198
1289924339	LC6G1L	0	0	0	2	0	0	0	0	0	60	0	0	0	93	64.5161
426489829	LC6G1L	0	0	0	13	0	0	0	0	0	58	0	0	0	247	23.4818
1007550646	PVLP104	0	0	49	8	0	0	0	5	0	54	0	0	0	1264	4.27215
701923413	mALD2	0	10	0	0	3	0	0	27	0	52	1	0	2	5161	1.00756
1321564092	AVLP001	44	0	26	0	22	32	27	0	0	51	0	1	0	12156	0.419546
5813070017	None	0	0	0	0	0	0	0	0	0	35	2	0	0	1076	3.25279
5813054053	OA-ASM3	0	0	0	2	0	0	0	0	0	31	0	0	0	3027	1.02412
1038938989	PVLP101	0	0	22	6	0	0	0	5	0	30	0	0	0	775	3.87097
Cells with a combined total of at least 30 synaptic connections to the 61 annotated LC6 cells in the hemibrain (release 1.1)
"new_type" lists the LC6G name if applicable, otherwise the hemibrain 1.1 type ("None" indicates cells not named in hembrain 1.1)
